# Supplementary material
Source: PubMed Central journal article supplement (PMC7088784)
Supplement: 11373_2006_9127_MOESM1_ESM.pdf [file 11373_2006_9127_MOESM1_ESM.pdf]

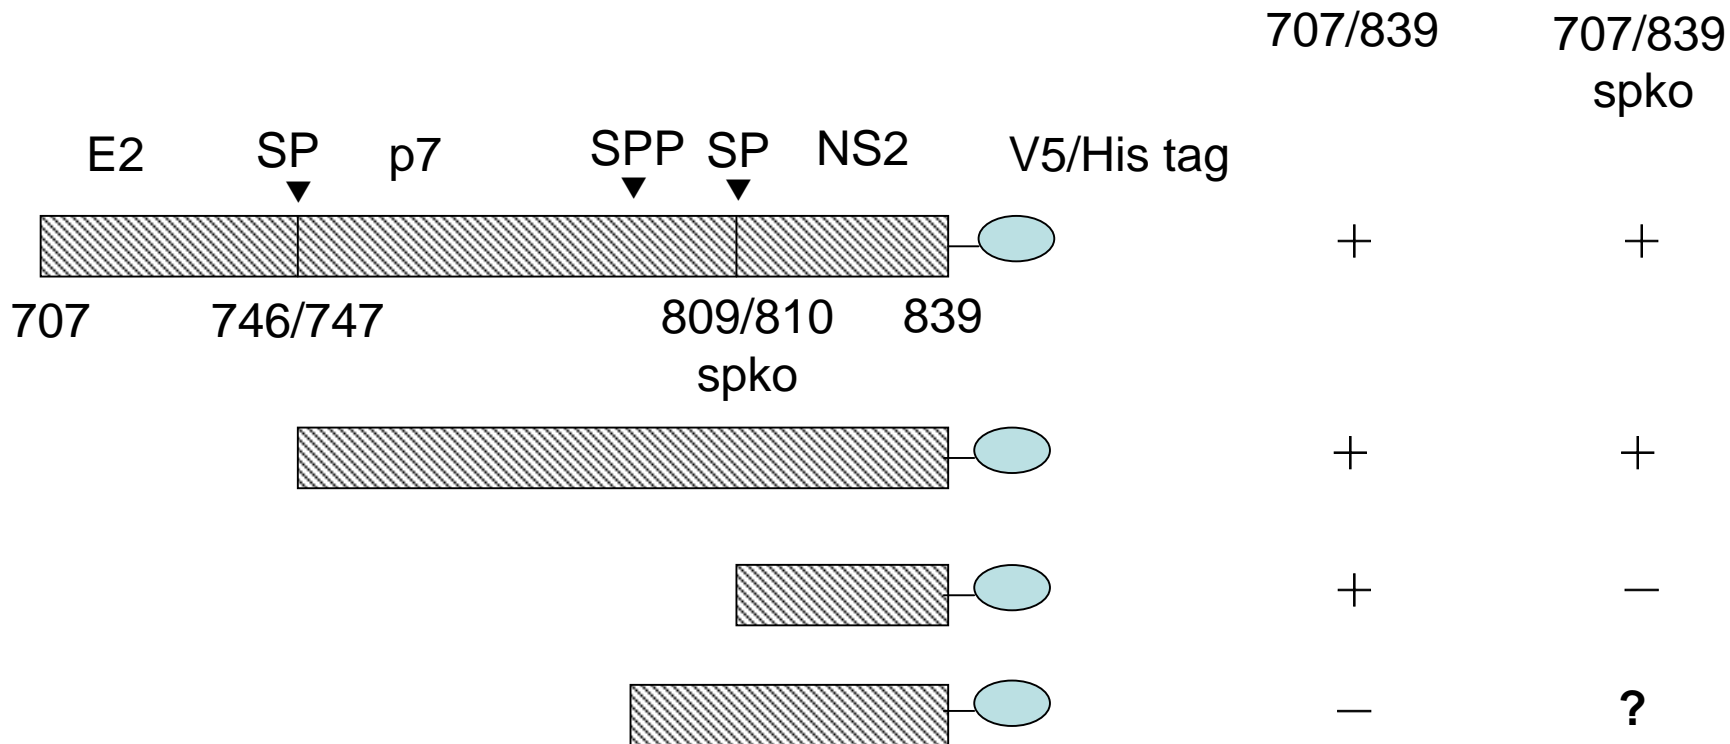

Supplement Fig. 1

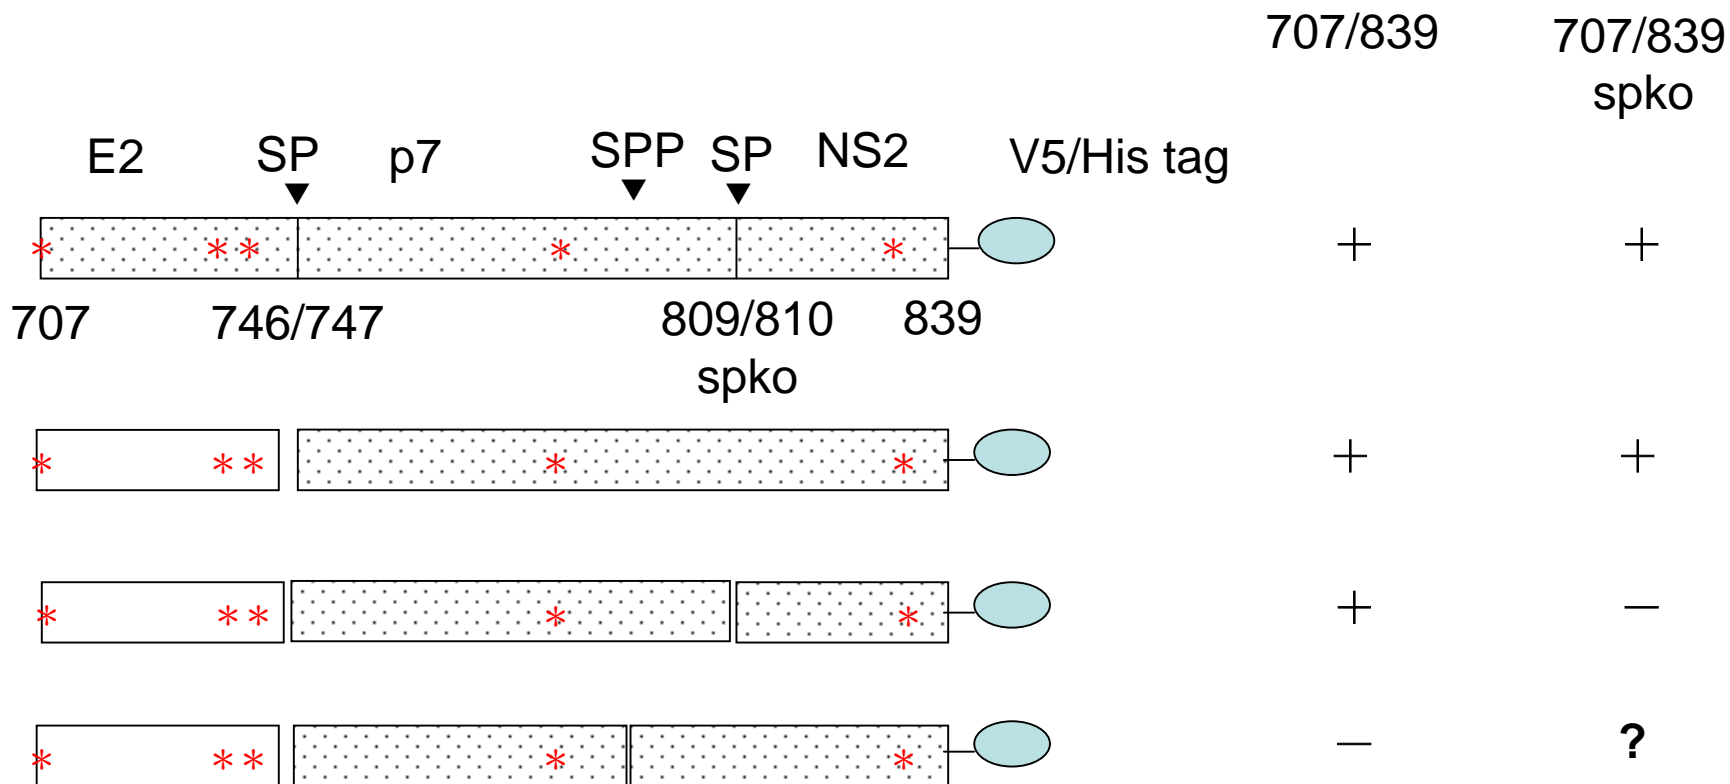

Supplement Fig. 2

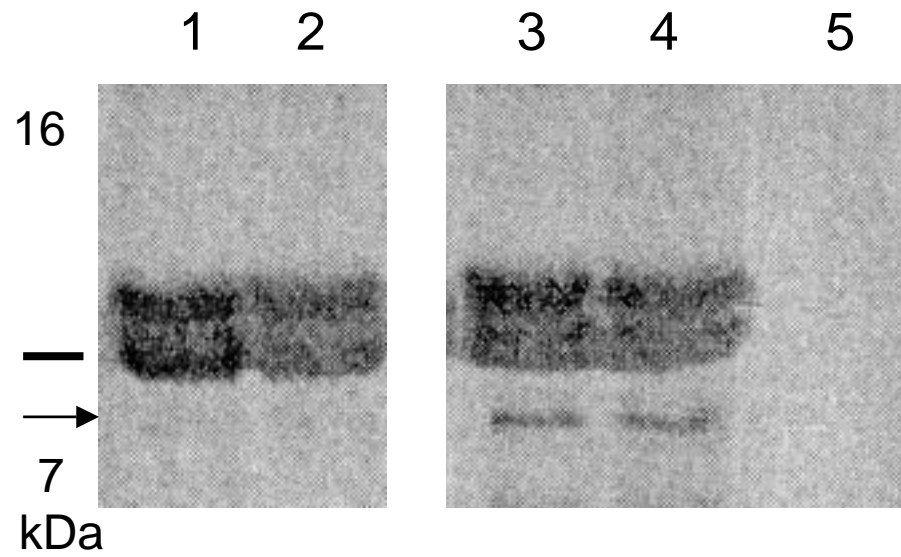

Supplement Fig. 3

**Figure legends of Supplement Fig. 3:**

**Recombinant DNA fragments containing HCV a.a. 707-839 (C-terminus of E2, p7 and N-terminus of NS2) plus V5-His tag were expressed in reticulocyte lysate with canine microsome. Both wild-type (lanes 3 and 4) and SPKO mutant (lanes 1 and 2) were analyzed. SPP inhibitor Z-(LL)2 was added in the *in vitro* translated products (lanes 2 and 4).**
